# Supplementary material
Source: PubMed Central journal article supplement (PMC4018925)
Supplement: AEM.03986-13_zam999105337so1.pdf [file AEM.03986-13_zam999105337so1.pdf]

1 **Efficient synthesis of eriodictyol from L-tyrosine in *Escherichia coli***

2

3 Saijie Zhu<sup>1,2</sup>, Junjun Wu<sup>1,2</sup>, Guocheng Du<sup>1,3</sup>, Jingwen Zhou<sup>1,2\*</sup>, Jian Chen<sup>1,2\*</sup>

4

5 **Running title: Efficient synthesis of eriodictyol in *Escherichia coli***

6

7 <sup>1</sup> Key Laboratory of Industrial Biotechnology, Ministry of Education, School of  
8 Biotechnology, Jiangnan University, 1800 Lihu Road, Wuxi, Jiangsu 214122, China;

9 <sup>2</sup> Synergetic Innovation Center of Food Safety and Nutrition, 1800 Lihu Road, Wuxi,  
10 Jiangsu 214122, China;

11 <sup>3</sup> National Engineering Laboratory for Cereal Fermentation Technology (NELCF),  
12 Jiangnan University, 1800 Lihu Road, Wuxi, Jiangsu 214122, China.

13

14 \* Corresponding authors.

15 Jingwen Zhou, Jian Chen

16 Mailing address: School of Biotechnology, Jiangnan University, 1800 Lihu Road,  
17 Wuxi, Jiangsu 214122, China

18 Phone: +86-510-85329031, Fax: +86-510-85918309

19 E-mail: zhoujw1982@jiangnan.edu.cn, jchen@jiangnan.edu.cn

20

21 **Materials and methods**

22 **RNA preparation and qPCR**

23 Total RNA of strains (BF1, BF2, BMF1 and BMF2) was purified using the  
24 RNAPrep Pure Cell/Bacteria Kit (TIANGEN, Beijing, China). *E.coli* total RNA was  
25 reverse transcribed with the PrimeScript RT reagent (TaKaRa, Dalian, China).  
26 Quantitative reverse transcription-PCR (qPCR) was used to measure the mRNA levels  
27 of specific genes in different plasmids, done by the LightCycler 480 II Real-Time  
28 PCR System (Roche Diagnostics, Mannheim, Germany) and SYBR Premix Ex Taq  
29 kits (TaKaRa, Dalian, China). The designed primers were showed in Table S1. 16S  
30 rRNA reverse transcriptase-PCR products were used as internal standards (1).

31 It was confirmed that the combination of pCDF-*TAL-4CL* and pET-*CHS-CHI*  
32 could prevent the accumulation of coumaroyl-CoA and reverse *TAL* inhibition in our  
33 previous works (2, 3). We also performed the qPCR experiment to make the process  
34 description more reliable. Another two strains were constructed: BQ1  
35 (pCDF-*TAL-4CL* and pET-*CHS-CHI*) and BQ2 (pET-*TAL-4CL* and pCDF-*CHS-CHI*).  
36

37 **Table S1. Oligonucleotides used in qPCR**

| Name            | Oligo Sequence (5'-3') | Target gene |
|-----------------|------------------------|-------------|
| q16S-F          | CTTCTTCTGCGGGTAACG     | 16S rRNA    |
| q16S-R          | CACTGGAAGTGAACACG      | 16S rRNA    |
| q <i>TAL</i> -F | GAGGTTAAGGTTAAGGATGATG | <i>TAL</i>  |
| q <i>TAL</i> -R | TGATGGCTGGTCTTGTTTC    | <i>TAL</i>  |

---

|            |                        |             |
|------------|------------------------|-------------|
| q $4CL$ -F | CTGCTGTCCCGTAAAGTTG    | $4CL$       |
| q $4CL$ -R | CGCCATAGTGCTGATTGC     | $4CL$       |
| q $CHS$ -F | ATGGTTACGGTGGAAGAATAC  | $CHS$       |
| q $CHS$ -R | ATG TTCAGAGTTGGTGATACG | $CHS$       |
| q $CHI$ -F | GGTCACGGGCAAATCATAAC   | $CHI$       |
| q $CHI$ -R | TCCAGCAGTTCTTCAGAGC    | $CHI$       |
| q $acs$ -F | AGATGGCTATTACTGGATAAC  | $acs$       |
| q $acs$ -R | TGCGGAATACCTACTACG     | $acs$       |
| q $ACC$ -F | GAAGAAGGCGGCGTTGAAG    | $ACC$       |
| q $ACC$ -R | TCGTCCGGTGAGGCATTCG    | $ACC$       |
| qt $FC$ -F | TTATTCCATCAGTTCCTCAC   | $tF3'H-CPR$ |
| qt $FC$ -R | ATTGCGTTCTTCATCCAG     | $tF3'H-CPR$ |

---

38

## 39 **Results**

### 40 **Transcriptional levels of genes on different vectors**

41 The results of qPCR were showed in Table S2. The qPCR results showed that the  
42 transcriptional levels of  $ACC$  in BMF2 was 7.93 times as that of BMF1. The  
43 transcriptional levels of  $acs$  in BMF2 was 8.19 times as that of BMF1. The  
44 transcriptional levels of  $tF3'H-tCPR$  in BF2 was 0.13 times as that of BF1. The  
45 transcriptional levels of  $tF3'H-tCPR$  in BMF2 was 0.12 times as that of BMF1. The  
46 transcriptional levels of  $TAL$  in BQ2 was 2.31 times as that of BQ1. The  
47 transcriptional levels of  $4CL$  in BQ2 was 2.11 times as that of BQ1. The

48 transcriptional levels of *CHI* in BQ2 was 0.65 times as that of BQ1. The  
49 transcriptional levels of *CHS* in BQ2 was 0.47 times as that of BQ1.

50

51 **Table S2. The transcriptional levels of genes in different strains.**

| Genes                         | The fold-change of transcriptional levels |
|-------------------------------|-------------------------------------------|
| <i>ACC</i> (BMF2/BMF1)        | 7.93 ± 0.22                               |
| <i>acs</i> (BMF2/BMF1)        | 8.19 ± 0.23                               |
| <i>tF3'H-tCPR</i> (BF2/BF1)   | 0.13 ± 0.01                               |
| <i>tF3'H-tCPR</i> (BMF2/BMF1) | 0.12 ± 0.01                               |
| <i>TAL</i> (BQ2/BQ1)          | 2.31 ± 0.07                               |
| <i>4CL</i> (BQ2/BQ1)          | 2.11 ± 0.05                               |
| <i>CHI</i> (BQ2/BQ1)          | 0.65 ± 0.04                               |
| <i>CHS</i> (BQ2/BQ1)          | 0.47 ± 0.03                               |

52

### 53 **References**

- 54 1. **Sheridan G, Masters C, Shallcross J, Mackey B.** 1998. Detection of mRNA  
55 by Reverse Transcription-PCR as an Indicator of Viability in *Escherichia coli*  
56 Cells. *Appl. Environ. Microbiol.* **64**:1313-1318.
- 57 2. **Wu J, Du G, Zhou J, Chen J.** 2012. Metabolic engineering of *Escherichia*  
58 *coli* for (2S)-pinocembrin production from glucose by a modular metabolic  
59 strategy. *Metab. Eng.* **16**:48-55.
- 60 3. **Wu J, Liu P, Fan Y, Bao H, Du G, Zhou J, Chen J.** 2013. Multivariate

61 modular metabolic engineering of *Escherichia coli* to produce resveratrol from  
62 L-tyrosine. J. Biotechnol. **167**:404-411.  
63
